# Supplementary material for: Cohen’s h for detection of disease association with rare genetic variants
Source: PubMed Central journal article supplement (PMC4198687; doi:10.1186/1471-2164-15-875), 2014-10-08
Supplement: 12864_2014_6546_MOESM1_ESM.pdf [file 12864_2014_6546_MOESM1_ESM.pdf]

**Additional file 1** Additional information of sampling distributions of RD, Cohen's h and OR.

The asymptotic distribution for each of RD, Cohen's h and log(OR) can be derived by using the multivariate delta method. Suppose a random vector  $X = (X_1, \dots, X_p)$  has a mean vector  $\mu = (\mu_1, \dots, \mu_p)$  and a variance-covariance matrix  $\Sigma$ . Then, for a transformation of  $X$  is  $g(X)$ , the asymptotic distribution will be asymptotic normal  $N(\mu_g, \sigma_g^2)$  where  $\mu_g = g(\mu)$  and  $\sigma_g^2 = D\Sigma D'$ , where  $D$  is the matrix of partial derivatives of  $g(X)$  with respect to  $X$  and  $D'$  denotes the transpose matrix of  $D$ .

These three ES measures can be considered as a function of MAFs from case and control group. The joint distribution of estimates of MAFs at case and control group is

$$\begin{pmatrix} \hat{p}_1 \\ \hat{p}_2 \end{pmatrix} \sim N \left( \begin{pmatrix} p_1 \\ p_2 \end{pmatrix}, \begin{bmatrix} \frac{p_1(1-p_1)}{n_1} & 0 \\ 0 & \frac{p_2(1-p_2)}{n_2} \end{bmatrix} \right). \text{ Firstly, we derive the asymptotic}$$

distribution of the estimate for RD, denoted as  $\hat{d} = \hat{p}_1 - \hat{p}_2$ . Let  $g(\hat{p}_1, \hat{p}_2) = \hat{p}_1 - \hat{p}_2$ ,

the expectation value of  $\hat{p}_1 - \hat{p}_2$  is  $E(g(p_1, p_2)) = p_1 - p_2$  and variance is

$$Var(\hat{p}_1 - \hat{p}_2) = (1, -1) \times \begin{bmatrix} \frac{p_1(1-p_1)}{n_1} & 0 \\ 0 & \frac{p_2(1-p_2)}{n_2} \end{bmatrix} \times \begin{pmatrix} 1 \\ -1 \end{pmatrix} = \frac{p_1(1-p_1)}{n_1} + \frac{p_2(1-p_2)}{n_2}.$$

Hence  $\hat{d}$  is asymptotically distributed as a normal distribution

$N\left(d, \frac{p_1(1-p_1)}{n_1} + \frac{p_2(1-p_2)}{n_2}\right)$ . The genetic association test based on RD can be

defined as  $H_0: d = 0$  vs.  $H_1: d \neq 0$ , and the corresponding test statistic is

$$\frac{\hat{d}}{\sqrt{\hat{p}(1-\hat{p}) \times \left(\frac{1}{n_1} + \frac{1}{n_2}\right)}} \text{ where } \hat{p} = \frac{(n_1\hat{p}_1 + n_2\hat{p}_2)}{n_1 + n_2} \text{ is the MAF among whole ample.}$$

Next, for Cohen's h, the estimator is  $\hat{h} = g(\hat{p}_1, \hat{p}_2) = 2\arcsin(\sqrt{\hat{p}_1}) - 2\arcsin(\sqrt{\hat{p}_2})$ .

According to the delta method, the expectation of Cohen's h is

$$E(g(p_1, p_2)) = 2\arcsin(\sqrt{p_1}) - 2\arcsin(\sqrt{p_2}) \text{ and the variance is}$$

$$Var(g(\hat{p}_1, \hat{p}_2)) = \left( \frac{1}{\sqrt{p_1(1-p_1)}}, -\frac{1}{\sqrt{p_1(1-p_1)}} \right) \times \begin{bmatrix} \frac{p_1(1-p_1)}{n_1} & 0 \\ 0 & \frac{p_2(1-p_2)}{n_2} \end{bmatrix} \times \begin{pmatrix} \frac{1}{\sqrt{p_1(1-p_1)}} \\ -\frac{1}{\sqrt{p_1(1-p_1)}} \end{pmatrix}$$

$= \frac{1}{n_1} + \frac{1}{n_2}$ . The asymptotic distribution for  $\hat{h}$  is  $N\left(h, \frac{1}{n_1} + \frac{1}{n_2}\right)$ . The test statistic

based on the Cohen's h for  $H_0: h = 0$  vs.  $H_1: h \neq 0$  is  $\frac{\hat{h}}{\sqrt{\frac{1}{n_1} + \frac{1}{n_2}}}$ . Finally, we derive the

asymptotic distribution for log(OR) as below. The estimator for log(OR) is

$$\ln(\hat{OR}) = g(\hat{p}_1, \hat{p}_2) = \ln\left(\frac{\hat{p}_1/(1-\hat{p}_1)}{\hat{p}_2/(1-\hat{p}_2)}\right) \quad \text{and} \quad \text{the} \quad \text{expectation} \quad \text{is}$$

$$E(g(p_1, p_2)) = \ln\left(\frac{p_1/(1-p_1)}{p_2/(1-p_2)}\right) = \ln(OR) \quad . \quad \text{The} \quad \text{variance} \quad \text{is}$$

$$Var(g(\hat{p}_1, \hat{p}_2)) = \left( \frac{1}{p_1(1-p_1)}, \frac{1}{p_2(1-p_2)} \right) \times \begin{bmatrix} \frac{p_1(1-p_1)}{n_1} & 0 \\ 0 & \frac{p_2(1-p_2)}{n_2} \end{bmatrix} \times \begin{pmatrix} \frac{1}{p_1(1-p_1)} \\ \frac{1}{p_2(1-p_2)} \end{pmatrix}$$

$= \frac{1}{n_1 p_1 (1-p_1)} + \frac{1}{n_2 p_2 (1-p_2)}$ . Therefore, the asymptotic distribution of  $\ln(\hat{OR})$  is

$N\left(\ln(OR), \frac{1}{n_1 p_1 (1-p_1)} + \frac{1}{n_2 p_2 (1-p_2)}\right)$ . The test statistic for genetic association

based on  $\log(\text{OR})$  is  $\frac{\ln(\hat{OR})}{\sqrt{\frac{1}{n_1 \hat{p}_1 (1 - \hat{p}_1)} + \frac{1}{n_2 \hat{p}_2 (1 - \hat{p}_2)}}}$ .
