# Supplementary material for: Cohen’s h for detection of disease association with rare genetic variants
Source: PubMed Central journal article supplement (PMC4198687; doi:10.1186/1471-2164-15-875), 2014-10-08
Supplement: 12864_2014_6546_MOESM2_ESM.pdf [file 12864_2014_6546_MOESM2_ESM.pdf]

Additional file 2: Biases and MSEs for RD, Cohen's h and log(OR) for 22

chromosomes.

| Chr. | no. of rSNP | Bias $\times 10^4$ |           |         | MSE $\times 10^4$ |           |         | no. of cSNP | Bias $\times 10^4$ |           |         | MSE $\times 10^4$ |           |         |
|------|-------------|--------------------|-----------|---------|-------------------|-----------|---------|-------------|--------------------|-----------|---------|-------------------|-----------|---------|
|      |             | RD                 | Cohen's h | log(OR) | RD                | Cohen's h | log(OR) |             | RD                 | Cohen's h | log(OR) | RD                | Cohen's h | log(OR) |
| 1    | 4399        | -0.3               | 1.2       | 74.1    | 0.1               | 7.2       | 1165.1  | 28753       | 0.5                | 1.8       | 5.7     | 1.2               | 6.6       | 46.4    |
| 2    | 4341        | 0.0                | 5.3       | 99.2    | 0.1               | 7.2       | 1130.9  | 30271       | 2.3                | 5.8       | 15.5    | 1.2               | 6.7       | 46.1    |
| 3    | 3484        | -1.0               | -3.3      | -14.8   | 0.1               | 7.3       | 1155.7  | 25113       | -2.4               | -5.8      | -15.2   | 1.2               | 6.6       | 44.7    |
| 4    | 3506        | -0.3               | -2.7      | -55.3   | 0.2               | 7.4       | 1116.2  | 23447       | 1.7                | 5.8       | 20.5    | 1.2               | 6.7       | 47.2    |
| 5    | 3462        | -0.3               | 0.4       | 29.5    | 0.1               | 7.3       | 1042.3  | 24020       | 3.4                | 8.3       | 21.3    | 1.2               | 6.8       | 46.9    |
| 6    | 3138        | 0.4                | 1.3       | -26.4   | 0.2               | 7.3       | 966.3   | 24026       | -0.7               | -0.8      | 1.2     | 1.2               | 7.0       | 48.2    |
| 7    | 2641        | 1.3                | 8.4       | 60.8    | 0.1               | 7.0       | 1073.4  | 19504       | 0.4                | 1.3       | 4.8     | 1.2               | 6.6       | 45.7    |
| 8    | 2835        | 2.3                | 13.7      | 62.3    | 0.1               | 6.9       | 1091.7  | 20353       | 1.4                | 2.9       | 4.9     | 1.2               | 7.0       | 49.0    |
| 9    | 2514        | 1.3                | 7.9       | 37.8    | 0.1               | 7.3       | 1145.5  | 17134       | 0.5                | 2.3       | 10.3    | 1.2               | 7.1       | 49.6    |
| 10   | 3205        | 0.8                | 4.8       | 18.0    | 0.2               | 7.4       | 1137.4  | 20923       | -4.0               | -10.7     | -29.3   | 1.2               | 6.8       | 49.1    |
| 11   | 2656        | 1.3                | 5.6       | 25.4    | 0.1               | 7.6       | 1600.0  | 19456       | 1.2                | 3.9       | 12.4    | 1.2               | 7.1       | 49.3    |
| 12   | 2722        | -1.3               | -7.8      | -27.3   | 0.2               | 7.9       | 1147.2  | 18370       | -1.2               | -3.7      | -11.6   | 1.2               | 7.0       | 49.2    |
| 13   | 2124        | 0.2                | 8.0       | 188.2   | 0.2               | 8.2       | 1073.8  | 14063       | 0.0                | -0.3      | -1.8    | 1.2               | 6.7       | 47.6    |
| 14   | 1759        | 0.1                | -1.5      | -13.9   | 0.1               | 6.8       | 1166.2  | 11421       | -1.4               | -2.3      | -1.9    | 1.1               | 6.3       | 43.4    |
| 15   | 1610        | -1.6               | -1.0      | 166.7   | 0.1               | 7.3       | 1218.4  | 10287       | 1.3                | 2.9       | 6.5     | 1.2               | 7.0       | 48.2    |
| 16   | 1563        | 0.3                | -1.0      | -36.3   | 0.1               | 6.5       | 1053.6  | 11015       | -5.4               | -13.9     | -38.1   | 1.1               | 6.4       | 44.0    |
| 17   | 1160        | -5.3               | -29.2     | -135.9  | 0.2               | 7.6       | 1294.9  | 8257        | 5.8                | 14.7      | 38.8    | 1.2               | 7.0       | 47.1    |
| 18   | 1641        | -1.1               | -8.5      | -78.3   | 0.1               | 7.0       | 1172.2  | 10788       | -3.9               | -8.9      | -20.9   | 1.1               | 6.6       | 46.6    |
| 19   | 682         | 2.7                | 24.3      | 205.6   | 0.1               | 7.1       | 1129.4  | 4693        | -0.2               | -3.6      | -17.6   | 1.3               | 7.5       | 52.8    |
| 20   | 1402        | 2.4                | 15.0      | 88.1    | 0.1               | 6.9       | 905.2   | 9110        | 4.4                | 10.4      | 25.9    | 1.2               | 6.8       | 47.0    |
| 21   | 675         | 0.3                | -10.7     | -324.7  | 0.1               | 6.8       | 1174.8  | 5335        | 1.6                | 1.9       | 0.3     | 1.2               | 7.4       | 54.6    |
| 22   | 701         | 1.4                | 8.5       | 48.5    | 0.1               | 6.8       | 1109.6  | 4500        | 2.5                | 6.1       | 15.0    | 1.2               | 6.7       | 46.9    |
| all  | 52220       | -0.3               | 1.2       | 74.1    | 0.1               | 7.2       | 1165.1  | 360839      | 0.5                | 1.8       | 5.7     | 1.2               | 6.6       | 46.4    |
