# Supplementary material for: Cohen’s h for detection of disease association with rare genetic variants
Source: PubMed Central journal article supplement (PMC4198687; doi:10.1186/1471-2164-15-875), 2014-10-08
Supplement: 12864_2014_6546_MOESM3_ESM.pdf [file 12864_2014_6546_MOESM3_ESM.pdf]

Additional file 3: Type I error rates for RD, Cohen's h and log(OR) for 22 chromosomes.

| Chr | no. of rSNP | RD    | Cohen's h | log(OR) | no. of cSNP | RD    | Cohen's h | log(OR) |
|-----|-------------|-------|-----------|---------|-------------|-------|-----------|---------|
| 1   | 4399        | 0.048 | 0.052     | 0.045   | 28753       | 0.046 | 0.046     | 0.046   |
| 2   | 4341        | 0.053 | 0.057     | 0.049   | 30271       | 0.048 | 0.049     | 0.048   |
| 3   | 3484        | 0.050 | 0.052     | 0.048   | 25113       | 0.048 | 0.048     | 0.048   |
| 4   | 3506        | 0.049 | 0.054     | 0.046   | 23447       | 0.050 | 0.050     | 0.050   |
| 5   | 3462        | 0.056 | 0.059     | 0.052   | 24020       | 0.050 | 0.050     | 0.050   |
| 6   | 3138        | 0.064 | 0.068     | 0.061   | 24026       | 0.054 | 0.054     | 0.054   |
| 7   | 2641        | 0.048 | 0.050     | 0.044   | 19504       | 0.045 | 0.046     | 0.045   |
| 8   | 2835        | 0.042 | 0.049     | 0.042   | 20353       | 0.053 | 0.053     | 0.053   |
| 9   | 2514        | 0.050 | 0.054     | 0.046   | 17134       | 0.053 | 0.053     | 0.053   |
| 10  | 3205        | 0.052 | 0.056     | 0.050   | 20923       | 0.048 | 0.049     | 0.048   |
| 11  | 2656        | 0.056 | 0.066     | 0.053   | 19456       | 0.056 | 0.056     | 0.056   |
| 12  | 2722        | 0.059 | 0.063     | 0.054   | 18370       | 0.055 | 0.055     | 0.054   |
| 13  | 2124        | 0.065 | 0.067     | 0.060   | 14063       | 0.050 | 0.050     | 0.050   |
| 14  | 1759        | 0.043 | 0.047     | 0.039   | 11421       | 0.041 | 0.041     | 0.041   |
| 15  | 1610        | 0.052 | 0.058     | 0.050   | 10287       | 0.056 | 0.056     | 0.056   |
| 16  | 1563        | 0.038 | 0.042     | 0.036   | 11015       | 0.043 | 0.043     | 0.043   |
| 17  | 1160        | 0.051 | 0.055     | 0.045   | 8257        | 0.052 | 0.052     | 0.052   |
| 18  | 1641        | 0.046 | 0.052     | 0.043   | 10788       | 0.047 | 0.047     | 0.047   |
| 19  | 682         | 0.051 | 0.053     | 0.045   | 4693        | 0.053 | 0.053     | 0.053   |
| 20  | 1402        | 0.047 | 0.050     | 0.043   | 9110        | 0.050 | 0.050     | 0.050   |
| 21  | 675         | 0.046 | 0.049     | 0.044   | 5335        | 0.056 | 0.056     | 0.056   |
| 22  | 701         | 0.049 | 0.051     | 0.047   | 4500        | 0.045 | 0.045     | 0.045   |
| all | 52220       | 0.051 | 0.056     | 0.048   | 360839      | 0.050 | 0.050     | 0.050   |
