# Supplementary material for: Cohen’s h for detection of disease association with rare genetic variants
Source: PubMed Central journal article supplement (PMC4198687; doi:10.1186/1471-2164-15-875), 2014-10-08

Additional file 6: Proportions of mild, moderate, and large effect for common SNPs in CAD. Grey bar represents OR and Black bar denotes Cohen's h.

**A. mild effect for CAD**

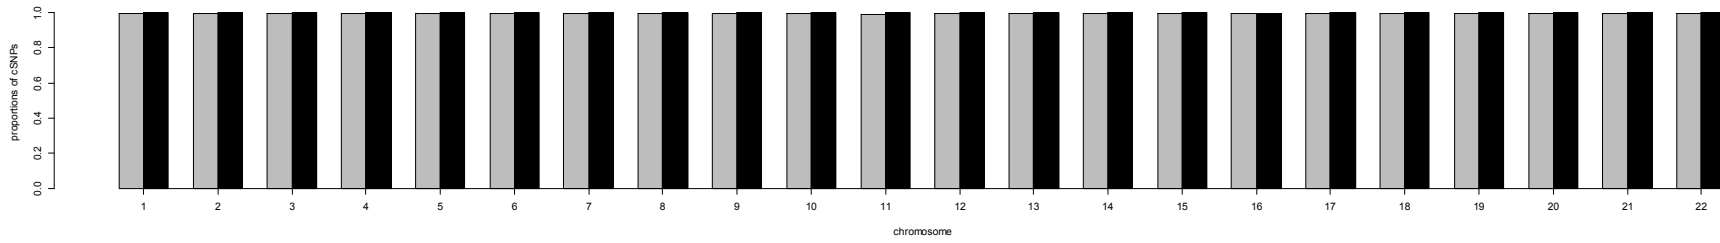

**B. moderate effect for CAD**

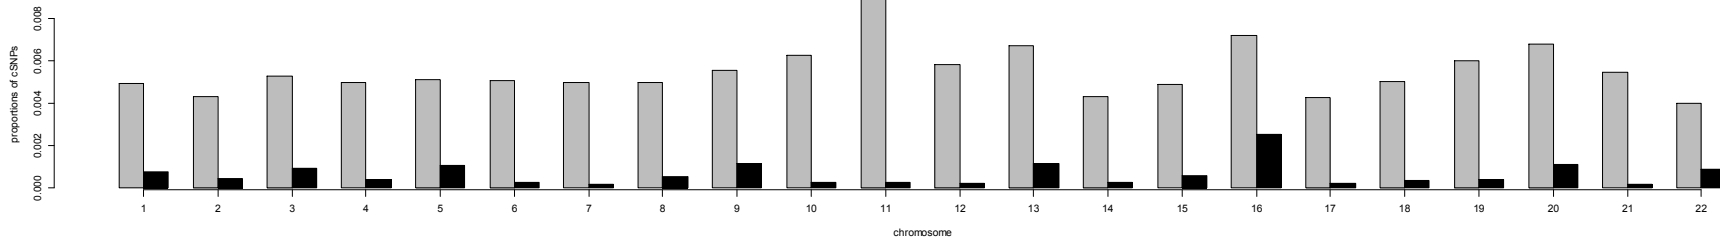

**C. large effect for CAD**

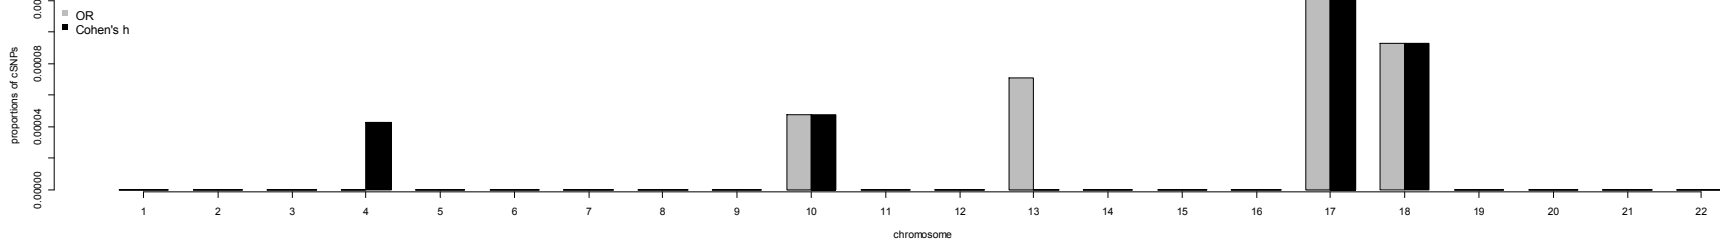

Supplement: 12864_2014_6546_MOESM6_ESM.pdf [file 12864_2014_6546_MOESM6_ESM.pdf]
